# Supplementary material for: Human ALPI deficiency causes inflammatory bowel disease and highlights a key mechanism of gut homeostasis
Source: PubMed Central journal article supplement (PMC5887907; doi:10.15252/emmm.201708483), 2018-03-22
Supplement: EMMM-10-e8483-s001.pdf [file EMMM-10-e8483-s001.pdf]

# Appendix

## Human ALPI deficiency causes inflammatory bowel disease and highlights a key mechanism of gut homeostasis

Marianna Parlato<sup>1, 2</sup>, Fabienne Charbit-Henrion<sup>1, 2, 3, 4</sup>, Jie Pan<sup>5</sup>, Claudio Romano<sup>2, 6</sup>, Rémi Duclaux-Loras<sup>1, 2, 3</sup>, Marie-Helene Ledu<sup>7</sup>, Neil Warner<sup>5</sup>, Paola Francalanci<sup>8</sup>, Julie Bruneau<sup>3, 9</sup>, Marc Bras<sup>10</sup>, Mohammed Zarhate<sup>11</sup>, Bernadette Bègue<sup>1, 2</sup>, Nicolas Guegan<sup>1, 3</sup>, Sabine Rakotobe<sup>1, 2</sup>, Nathalie Kapel<sup>12</sup>, Paola De Angelis<sup>8</sup>, Anne M Griffiths<sup>5</sup>, Karoline Fiedler<sup>5</sup>, Eileen Crowley<sup>5</sup>, Frank Ruemmele<sup>1, 2, 3, 4</sup>, Aleixo M. Muise<sup>5, 13, 14,\*</sup>, Nadine Cerf-Bensussan<sup>1, 2, 3,\*</sup>

<sup>1</sup> INSERM, UMR1163, Laboratory of Intestinal Immunity and Institut Imagine, F-75015 Paris, France.

<sup>2</sup> GENIUS group from ESPGHAN.

<sup>3</sup> Université Paris Descartes-Sorbonne Paris Cité, F-75015 Paris, France.

<sup>4</sup> Assistance Publique-Hôpitaux de Paris, Hôpital Necker-Enfants Malades, Department of Pediatric Gastroenterology, Paris, France.

<sup>5</sup> SickKids Inflammatory Bowel Disease Center and Cell Biology Program, Research Institute, Hospital for Sick Children, Toronto, Ontario, Canada.

<sup>6</sup> Unit of Pediatrics, Department of Human Pathology in Adulthood and Childhood "G. Barresi", University of Messina, Viale Consolare Valeria, 98124, Messina, Italy.

<sup>7</sup> Department of Biochemistry, Biophysics and Structural Biology, Institute for Integrative Biology of the Cell (I2BC), CEA, UMR 9198 CNRS, Université Paris-Sud, Batiment 144, CEA Saclay, Gif-sur-Yvette, F-91191, France.

<sup>8</sup> Digestive Endoscopy and Surgery Unit and Pathology Unit Bambino Gesù Children Hospital, IRCCS, Piazza Sant'Onofrio 4, 00165 Rome, Italy.

<sup>9</sup> Department of Pathology, Necker-Enfants Malades Hospital, Assistance Publique-Hôpitaux de Paris, 75015 Paris, France.

<sup>10</sup> Bioinformatics platform, Université Paris-Descartes-Paris Sorbonne Centre and Institut Imagine, F-75015 Paris, France.

<sup>11</sup> Genomic Platform, INSERM UMR 1163, Paris Descartes Sorbonne Paris Cite University, Imagine Institute, 75015 Paris, France.

<sup>12</sup> Department of Functional Coprology, Pitié Salpêtrière Hospital, Assistance publique-Hôpitaux de Paris (AP-HP), Paris, France.

<sup>13</sup> Division of Gastroenterology, Hepatology, and Nutrition, Department of Pediatrics, University of Toronto, Hospital for Sick Children, Toronto, Ontario, Canada.

<sup>14</sup> Department of Biochemistry, Institute of Medical Science, University of Toronto, Toronto, Ontario, Canada.

\* These authors share senior authorship

## Table of Content

|                                                                                                               |   |
|---------------------------------------------------------------------------------------------------------------|---|
| <b>Appendix Fig S1:</b> BLAST sequence alignment and coordinates of ALPP.....                                 | 3 |
| <b>Appendix Table S1:</b> Autosomal recessive and <i>de novo</i> variants identified by WES in Patient 1..... | 4 |
| <b>Appendix Table S2:</b> Autosomal Recessive and <i>de novo</i> variants identified by WES in Patient 2..... | 5 |

## Appendix Fig S1: BLAST sequence alignment and coordinates of ALPP (entry code 1EW2)<sup>1</sup>.

Sequence alignment Query= ALPP; Sbjct= ALPI

```
sp|P05187|PPB1_HUMAN Alkaline phosphatase, placental type OS=Homo sapiens
GN=ALPP PE=1 SV=2
Sequence ID: Query_182371Length: 535Number of Matches: 1
Related Information
Range 1: 23 to 516 Graphics Next Match Previous Match

Query 20  VIPAEENPAFWNRQAAEALDAAKKLQPIQKVAKNLILFLGDGLGVPTVTATRILKGQKN 79
      +IP EEENP FWNR+AAEAL AAKKLQP Q  AKNLI+FLGDG+GV TVTA RILKGQK
Sbjct 23  IIPVEEENPDFWNREAAEALGAAKKLQPAQTAAKNLIIIFLGDGMGVSTVTAARILKGQKK 82

Query 80  GKLGPEPETPLAMDRFPYLALSKTYNVDRQVPDSAATATAYLCGVKANFQTIGLSAAARFNQ 139
      KLGPE PLAMDRFPY+ALSKTYNVDPDS ATATAYLCGVK NFQTIGLSAAARFNQ
Sbjct 83  DKLGP EIP LAMDRFPYVALSKTYNVDKHVPDSGATATAYLCGVKGNFQTIGLSAAARFNQ 142

Query 140 CNTTRGNEVISVMNRAKQAGKSVGVTTTRVQHASPAGTYAHTVNRNWYSDADMPASARQ 199
      CNTTRGNEVISVMNRAK+AGKSVGVTTTRVQHASPAGTYAHTVNRNWYSDAD+PASARQ
Sbjct 143 CNTTRGNEVISVMNRAKKAGKSVGVTTTRVQHASPAGTYAHTVNRNWYSDADVPASARQ 202

Query 200 EGCQDIATQLISNMDIDVILGGGRKYMFPMTDPPEYPADASQNGIRLDGKNLVQEWLAK 259
      EGCQDIATQLISNMDIDVILGGGRKYMFGTDPPEYP D SQ G RLDGKNLVQEWLAK
Sbjct 203 EGCQDIATQLISNMDIDVILGGGRKYMFRMGTPDPEYPDDYSQGGTRLDGKNLVQEWLAK 262

Query 260 HQGAWYVWNRTELMQASLDQSVTHLMGLFEPGDTKYEIHRDPTLDPSLMEMTEAALRLLS 319
      QGA YVWNRTELMQASLD SVTHLMGLFEPGD KYEIHRD TLDSLMEMTEAALRLLS
Sbjct 263 RQGARYVWNRTELMQASLDSSVTHLMGLFEPGDMKYEIHRDSTLDPSLMEMTEAALRLLS 322

Query 320 RNPRGFYLFVEGGRIDHGHHEGVAYQALTEAVMFDDAIERAGQLTSEEDTLTLVTADHSH 379
      RNPRGF+LFVEGGRIDHGHHE AY+ALTE +MFDDAIERAGQLTSEEDTL+LVTADHSH
Sbjct 323 RNPRGFFLFVEGGRIDHGHHESRAYRALTETIMFDDAIERAGQLTSEEDTLSLVTADHSH 382

Query 380 VFSFGGYTLRGSSIFGLAPSKAQDSKAYTSILYGNPGYVFNSGVRPDVNESESGSPDYQ 439
      VFSFGGY LRGSSIFGLAP KA+D KAYT +LYGNPGYV G RPDV ESESGSP+Y+
Sbjct 383 VFSFGGYPLRGSSIFGLAPGKARDRKAYTVLLYGNPGYVLKDGARPDVTESESGSPEYR 442

Query 440 QQAAVPLSSETHGGEDVAVFARGPQAHLVHGVQEQSFVAHVMAFAACLEPYTACDLAPPA 499
      QQ+AVPL ETH GEDVAVFARGPQAHLVHGVQEQ+F+AHVMAFAACLEPYTACDLAPPA
Sbjct 443 QQSAVPLDEETHAGEDVAVFARGPQAHLVHGVQEQTFIAHVMAFAACLEPYTACDLAPPA 502

Query 500 CTTDAAHPVAASLP 513
      TTDAHP + +P
Sbjct 503 GTTDAHPGRSVVP 516
```

<sup>1</sup> Le Du MH, Stigbrand T, Taussig MJ, Menez A, Stura EA. Crystal structure of alkaline phosphatase from human placenta at 1.8 Å resolution. Implication for a substrate specificity. *J Biol Chem.* 2001 Mar 23;276(12):9158-65.

**Appendix Table S1:** Autosomal recessive and *de novo* variants identified by WES in Patient1

| <b>Gene</b>                        | <b>Variant</b>                  | <b>Protein</b> | <b>SIFT</b> | <b>MUTATION TASTER</b> | <b>POLYPHEN</b>   |
|------------------------------------|---------------------------------|----------------|-------------|------------------------|-------------------|
| <i>de novo:</i><br><b>SETD1A</b>   | 16 :30991333 C/A                | p.Pro1409Gln   | Tolerated   | Polymorphism           | Benign            |
| <i>de novo:</i><br><b>ADAMTS14</b> | rs758220536                     | p.Arg451His    | Deleterious | Disease causing        | Probably damaging |
| <b>AR<sup>1</sup>: ALPI</b>        | 2:233321394 G/A                 | p.Ala97Thr     | Deleterious | Disease causing        | Probably damaging |
|                                    | 2:233322984 C/T                 | p.Ala350Val    | Tolerated   | Disease causing        | Possibly damaging |
| <b>AR: NWD1</b>                    | 19:16918475 C/T                 | p.Thr1272Met   | Tolerated   | Polymorphism           | Probably damaging |
|                                    | rs191976059                     | p.His843Gln    | Tolerated   | Polymorphism           | Benign            |
| <b>AR: KRTAP5-4</b>                | rs200027081                     | p.Val152Gly    | not scored  | not scored             | not scored        |
|                                    | 11:1643184_TGAG<br>CCACAGCCCCCA | frameshift     | not scored  | not scored             | not scored        |
| <b>AR: TLN1</b>                    | rs141770878                     | p.Lys2115Glu   | Deleterious | Disease causing        | Probably damaging |
|                                    | rs200664793                     | p.Thr585Met    | Tolerated   | Disease causing        | Possibly damaging |
|                                    | rs144809355                     | p.Ala2013Thr   | Tolerated   | Disease causing        | Possibly damaging |
| <b>AR: HGFAC</b>                   | rs149401735                     | p.Pro84Arg     | Tolerated   | Polymorphism           | Benign            |
| <b>AR: TBX22</b>                   | X:79277859 G/C                  | p.Glu31Gln     | Tolerated   | Polymorphism           | Benign            |
| <b>AR: ARSF</b>                    | rs764160465                     | p.Thr299Met    | Deleterious | Disease causing        | Possibly damaging |
| <b>AR: KIAA1875</b>                | rs540903279                     | p.Glu1207Lys   | not scored  | not scored             | Possibly damaging |

**Appendix Table S2:** Autosomal Recessive and *de novo* variants identified by WES in Patient2

| <b>Gene</b>                      | <b>Variant</b>     | <b>Protein</b>                   | <b>SIFT</b> | <b>MUTATION TASTER</b> | <b>POLYPHEN</b>   |
|----------------------------------|--------------------|----------------------------------|-------------|------------------------|-------------------|
| <i>de novo:</i><br><b>ADRAID</b> | rs55915202         | p.Ala460Val                      | Tolerated   | Disease causing        | Benign            |
| <i>de novo:</i><br><b>FKBP10</b> | 17:39973373        | frameshift                       | not scored  | not scored             | not scored        |
| <i>de novo:</i><br><b>FOXP2</b>  | 7:114271580        | 3 nt deletion in splice_acceptor | not scored  | not scored             | not scored        |
| <b>AR: ALPI</b>                  | rs146257849        | p.Ala360Val                      | Tolerated   | Disease causing        | Probably damaging |
|                                  | 2:233323584<br>C/T | p.Gln439X                        | not scored  | not scored             | not scored        |
| <b>AR: FLG</b>                   | rs12750571         | p.Arg1437Cys                     | Tolerated   | Polymorphism           | Possibly damaging |
|                                  | rs143382793        | p.Gly929Val                      | Tolerated   | Polymorphism           | Possibly damaging |
| <b>AR: FRMPD1</b>                | rs200027081        | p.Val152Gly                      | Deleterious | Disease causing        | Possibly damaging |
|                                  | rs140778637        | p.Glu1519Ala                     | Deleterious | Disease causing        | Possibly damaging |
| <b>AR: MUC17</b>                 | 7:100678206<br>C/T | p.Thr1170Met                     | Deleterious | Disease causing        | Possibly damaging |
|                                  | rs145956810        | p.Ser1788Leu                     | Deleterious | Disease causing        | Possibly damaging |
| <b>AR: NT5C3B</b>                | rs139142062        | p.Arg263His                      | Deleterious | Disease causing        | Probably damaging |
|                                  | 7:39992191<br>C/A  | p.Ala11Ser                       | Tolerated   | Disease causing        | Benign            |
| <b>AR: PCDH9</b>                 | rs149158184        | p.Ser1209Arg                     | Tolerated   | Disease causing        | Benign            |
|                                  | rs149470963        | p.Ser1017Arg                     | Tolerated   | Disease causing        | Benign            |
|                                  | rs139732295        | p.Val885Leu                      | Deleterious | Disease causing        | Probably damaging |
| <b>AR: FAT2</b>                  | rs61743253         | p.Arg368Lys                      | Tolerated   | Polymorphism           | Possibly damaging |
| <b>AR: RIOK1</b>                 | rs55698032         | p.Arg114Gln                      | Tolerated   | Disease causing        | Benign            |
| <b>AR: STX8</b>                  | rs55698032         | p.Arg141Gln                      | Tolerated   | Disease causing        | Benign            |
